# Supplementary material for: The different clinical facets of SYN1-related neurodevelopmental disorders
Source: Front Cell Dev Biol. 2022 Dec 8;10:1019715. doi: 10.3389/fcell.2022.1019715 (PMC9773998; doi:10.3389/fcell.2022.1019715)
Supplement: Supplementary file 2 [file Table1.xlsx]

## Sheet: Supplementary Table 1
Supplementary Table 1. SYN1variant types and classification
hg19	HGVS cDNA (NM_006950.3)	HGVS protein	Variant type	CADD	Splice AI	DynaMut2	mCSM	gnomAD	ACMG criteria	Classification	Source
g.47479096C>G	c.32G>C	p.(Ser11Thr)	missense	24	0/0/0/0	low AlphaFold model confidence	low AlphaFold model confidence	-	PM2, PP2, PP3	VUS	van der Ven et al. 2021
g.47478892G>C	c.236C>G	p.(Ser79Trp)	missense	28.6	0/0/0/0	low AlphaFold model confidence	low AlphaFold model confidence	-	PS3, PM2, PP1, PP2, PP3	Likely pathogenic	Guarnieri et al. 2017; Claes et al. 1997
g.47478752A>T	c.376T>A	p.(Trp126Arg)	missense	23.1	0/0/0/0	Destabilizing (-2.88 kcal/mol)	Highly destabilizing (-2.79 kcal/mol)	-	PM2, PP2, PP3	VUS	Fernández-Marmiesse et al. 2019
g.47478751C>T	c.377G>A	p.(Trp126*)	nonsense	40	0/0.17(0bp)/0/0	-	-	-	PVS1, PM2, PP3	Pathogenic	Butler et al. 2017
g.47466436C>G	c.436-1G>C	p.?	splicing	34	0.98(-1bp)/0/0.52(29bp)/0	-	-	-	PVS1, PM2, PP3	Pathogenic	Accogli et al. 2021
g.47466343C>A	c.527+1G>T	p.?	splicing	35	0/1(1bp)/0/0.8(9bp)	-	-	-	PVS1, PM2, PP1, PP3	Pathogenic	Peron et al. 2018
g.47464671C>A	c.635G>T	p.(Ser212Ile)	missense	26.8	0/0/0/0	Stabilizing (0.92 kcal/mol)	Stabilizing (0.395 kcal/mol)	-	PM2, PP2, PP3	VUS	Rossi et al. 2017
g.47464375A>G	c.774+2T>C	p.?	splicing	33	0/0.7(2bp)/0/0	-	-	-	PVS1, PM2, PP3	Pathogenic	Accogli et al. 2021
g.47436879C>T	c.796G>A	p.(Val266Met)	missense	24.7	0.02(21bp)/0/0/0	Destabilizing (-1.19 kcal/mol)	Destabilizing (-1.093 kcal/mol)	-	PM2, PP2, PP3	VUS	Ibarluzea et al. 2020
g.47436858C>T	c.817G>A	p.(Ala273Thr)	missense	22.6	0.01(42bp)/0/0/0	Destabilizing (-1.00 kcal/mol)	Destabilizing (-1.092 kcal/mol)	-	PM2, PP2, PP3	VUS	Stranneheim et al. 2021
g.47435948G>T	c.929C>A	p.(Ala310Asp)	missense	23.8	0/0/0/0	Destabilizing (-0.49 kcal/mol)	Destabilizing (-0.947 kcal/mol)	-	PM2, PP2, PP3	VUS	Accogli et al. 2021
g.47435621C>T	c.1067G>A	p.(Trp356*)	nonsense	36	0/0/0/0	-	-	-	PVS1, PM2, PP1, PP3	Pathogenic	Garcia et al. 2004
g.47435612G>T	c.1076C>A	p.(Thr359Lys)	missense	22.4	0/0/0/0	Destabilizing (-0.46 kcal/mol)	Destabilizing (-0.562 kcal/mol)	1/161942	PM2, PP2, PP3	VUS	Xiong et al. 2021
g.47434573C>T	c.1259G>A	p.(Arg420Gln)	missense	22.4	0/0/0/0	Stabilizing (0.89 kcal/mol)	Stabilizing (0.421 kcal/mol)	-	PM2, PP1, PP2, PP3, PS3	Likely pathogenic	Darvish et al. 2020
g.47434568G>A	c.1264C>T	p.(Arg422*)	nonsense	36	0/0/0/0	-	-	1/146703	PVS1, PM2, PP3	Pathogenic	Lindy et al. 2018; Accogli et al. 2021
g.47434566del	c.1266delA	p.(Gln423Serfs*244)	frameshift	29.1	0/0/0/0	-	-	-	PVS1, PM2, PP3	Pathogenic	Accogli et al. 2021
g.47433977dup	c.1406dupA	p.(Pro470Alafs*214)	frameshift	32	0/0/0/0	-	-	-	PVS1, PM2, PP1, PP3	Pathogenic	Accogli et al. 2021
g.47433948dup	c.1439dupC	p.(Leu481Ilefs*203)	frameshift	33	0/0/0/0	-	-	-	PVS1, PM2, PP1, PP3	Pathogenic	Accogli et al. 2021
g.47433939G>A	c.1444C>T	p.(Gln482*)	nonsense	36	0/0/0/0	-	-	-	PVS1, PM2, PP3	Pathogenic	Xiong et al. 2021
g.47433910_47433911insA	c.1472_1473insT	p.(Gln491Hisfs*193)	frameshift	33	0/0/0/0	-	-	-	PVS1, PM2, PP3	Pathogenic	Accogli et al. 2021
g.47433744_47433747dup	c.1647_1650dupCGCC	p.(Ser551Argfs*134)	frameshift	32	0/0/0/0	-	-	-	PVS1, PM2, PP3	Pathogenic	Accogli et al. 2021
g.47433735C>T	c.1648G>A	p.(Ala550Thr)	missense	21.5	0/0/0.01(-18bp)/0	low AlphaFold model confidence	low AlphaFold model confidence	-	PS3, PM2, PP1, PP2, PP3	Likely pathogenic	Fassio et al. 2011; Mojarad et al. 2021
g.47433720G>A	c.1663C>T	p.(Gln555*)	nonsense	37	0/0/0/0	-	-	-	PVS1, PS3, PM2, PP1, PP3	Pathogenic	Fassio et al. 2011, Nguyen et al. 2015, Cabana et al. 2018
g.47433717G>A	c.1666C>T	p.(Arg556Cys)	missense	25.4	0/0/0/0	low AlphaFold model confidence	low AlphaFold model confidence	-	PM2, PP2, PP3	VUS	Yang et al. 2020
g.47433614_47433625dup	c.1760_1771dup	p.(Arg587_Pro590dup)	in-frame duplication	20.3	0/0/0/0	-	-	-	PM2, PM4, PP3	VUS	Accogli et al. 2021
g.47433576G>A	c.1807C>T	p.(Gln603*)	nonsense	38	0/0/0/0	-	-	-	PVS1, PM2, PP1, PP3	Pathogenic	Zhou et al. 2021
g.47479126del	c.2del	p.?	start loss	22.6	0/0/0/0	-	-	-	PVS1, PM2, PP1, PP3	Pathogenic	This cohort
g.47434577dup	c.1258dup	p.(Arg420Profs*264)	frameshift	32	0/0/0/0	-	-	-	PVS1, PM2, PP3	Pathogenic	This cohort
g.47435903del	c.975del	p.(Tyr326Thrfs*2)	frameshift	31	0/0/0/0.03(37bp)	-	-	-	PVS1, PM2, PP1, PP3	Pathogenic	This cohort
g.47433655del	c.1729del	p.(Ala577Profs*90)	frameshift	32	0/0/0/0	-	-	-	PVS1, PM2, PP3	Pathogenic	This cohort
g.47435786del	c.1001del	p.(Asn334Thrfs*74)	frameshift	31	0/0/0.01(18bp)/0	-	-	-	PVS1, PM2, PP1, PP3	Pathogenic	This cohort
g.47433948dup	c.1439dup	p.(Leu481Ilefs*203)	frameshift	33	0/0/0/0	-	-	-	PVS1, PM2, PP3	Pathogenic	This cohort
g.47433481_47433593del	c.1794_1906del	p.(Thr601Glufs*45)	frameshift	33	-	-	-	-	PVS1, PM2, PP3	Pathogenic	This cohort
g.47433936G>A	c.1447C>T	p.(Gln483*)	nonsense	37	0/0/0/0	-	-	-	PVS1, PM2, PP1, PP3	Pathogenic	This cohort
g.47434162dup	c.1321dup	p.(Ala441Glyfs*243)	frameshift	34	0/0/0/0	-	-	-	PVS1, PM2, PP3	Pathogenic	This cohort
g.47435616C>T	c.1072G>A	p.(Asp358Asn)	missense	25.3	0/0/0/0	Destabilizing (-0.6 kcal/mol)	Destabilizing (-0.979 kcal/mol)	-	PM2, PP2, PP3	VUS	This cohort
g.47435800G>A	c.986 C>T	p.(Thr329Met)	missense	25	0/0/0.04(2bp)/0	Stabilizing (0.53 kcal/mol)	Stabilizing (0.191 kcal/mol)	-	PM2, PS2, PP2, PP3	Likely pathogenic	This cohort
g.47434568G>A	c.1264C>T	p.(Arg422*)	nonsense	36	0/0/0/0	-	-	1/146703	PVS1, PM2, PP3	Pathogenic	This cohort
g.47435923C>A	c.954G>T	p.(Lys318Asn)	missense	23.4	0/0/0/0.11(15bp)	Destabilizing (-1.79 kcal/mol)	Destabilizing (-1.701 kcal/mol)	-	PM2, PS2, PP2, PP3	Likely pathogenic	This cohort
g.47464692A>T	c.614T>A	p.(Leu205Gln)	missense	27.3	0/0/0/0	Destabilizing (-2.41 kcal/mol)	Highly destabilizing (-2.488 kcal/mol)	-	PM2, PP2, PP3	VUS	This cohort
g.47464377C>A	c.774G>T	p.(Met258Ile)	missense	33	0/0.01(0bp)/0/0	Destabilizing (-0.42 kcal/mol)	Destabilizing (-1.179 kcal/mol)	-	PM2, PP2, PP3	VUS	This cohort
g.47464406G>A	c.745C>T	p.(Gln249*)	nonsense	38	0/0/0/0	-	-	-	PVS1, PM2, PP3	Pathogenic	This cohort
g.47478788T>C	c.340A>G	p.(Arg114Gly)	missense	23.4	0/0/0/0.03(46bp)	Destabilizing (-1.79 kcal/mol)	Destabilizing (-1.622 kcal/mol)	1/145765	PM2, PP2, PP3	VUS	This cohort
g.47479091del	c.39del	p.(Phe13Leufs*10)	frameshift	27.3	0/0/0/0	-	-	-	PVS1, PM2, PP3	Pathogenic	This cohort
g.47435567G>A	c.1121C>T	p.(Ala374Val)	missense	23.9	0/0/0/0	Destabilizing (-0.69 kcal/mol)	Destabilizing (-0.171 kcal/mol)	-	PM2, PP1, PP2, PP3	VUS	This cohort
g.47435805_47435854del	c.980+43_981del	p.(Met327Ilefs*81)	frameshift	24.2	0.99(1bp)/0/0/0	-	-	-	PVS1, PM2, PM6, PP3	Pathogenic	This cohort
g.47464692_47464694dup	c.614_616dup	p.(Leu205dup)	in-frame duplication	21.4	0/0/0/0	-	-	-	PS2, PM4, PP3	VUS	This cohort
g.47464780T>A	c.528-2A>T	p.?	splicing	34	1(-2bp)/0/0.76(-12bp)/0	-	-	-	PVS1, PM2, PP3	Pathogenic	This cohort
Legend: Splice AI scores are indicated as follows Acceptor loss/donor loss/acceptor gain/donor gain. Scores >0.5 (recommended) appear in orange and scores >0.8 (high precision) appear in red
DynaMut and mCSM allow the prediction of the effects of mutations on protein stability. The AlphaFold SYN1 protein structure (AF-P17600-F1-model_v3) was used for the analysis. Residues with a confidence score <70 were excluded from the analysis

## Sheet: Supplementary Table 2
Supplementary Table 2. Detailed clinical information of the SYN1 individuals of our cohort
Patient information
Individual ID in manuscript	1	2	3	4	5	6	7	8	9	10	11	12	13	14	15	16	17	18	19	20	21	22	23	24	25	26	27	28	29	30	31
Family number	Family 1 (IV-1)	Family 1 (IV-2)	Family 1 (III-4)	Family 2	Family 3 (IV-3)	Family 3 (IV-5)	Family 4	Family 5 (III-9)	Family 5 (II-4)	Family 5 (II-2)	Family 5 (II-1)	Family 6 (III-1)	Family 7 (III-1)	Family 8 (II-1)	Family 8 (II-2)	Family 8 (II-3)	Family 9	Family 10 (III-2)	Family 11	Family 12 (III-1)	Family 13	Family 14	Family 15	Family 16 (III-2)	Family 17	Family 18	Family 19 (II-1)	Family 19 (II-3)	Family 20	Family 21	Family 22 (III-2)
Sex	M	M	M	M	M	M	M	M	M	M	M	M	M	M	M	M	M	M	F	M	M	M	M	M	M	M	M	M	F	M	M
Country	Germany	Germany	Germany	France	France	France	France	France	France	France	France	France	France	France	France	France	France	France	USA	Netherlands	Netherlands	France	France	France	France	Denmark	France	France	France	Spain	USA
Age at the time of the study	13y	9y6m	22y		32y	17y	9y	20y	38y	53 y		54y	9y	18y	16y	13y	8y	8y	3y 10m	16y	12y	16y	11y	16y	9y	13 y 11 m	8y		6y	18y	21y
Family history	Multiple affected family members			Unknown	A maternal uncle (II-3) diagnosed with seizure and ID		Maternal grandfather with ID and epilepsy	Three affected maternal uncles (Patients 9, 10, and 11)				Several affected family members with same phenotype. One brother has seizure and carries the same variant in SYN1 (no follow-up of the brother available)	Learning disabilities in both parents, several family members with vision impairment	None	None	None	None	Maternal grandmother and aunt also carry the same SYN1 variant	The mother has frequent elbow dislocations, functional neurologic disorder, seizures, spasms, hallucinations, chronic daily headaches, back pain related to a bulging disk, blood pressure variability, and ovarian cyst. She had one miscarriage. Maternal aunt passed away at 11 hours old. She was born at 25 weeks old, and had a sacral coccygeal teratoma. Maternal extended family history of seizures, …	Maternal epilepsy (diagnosed at 19 years, but with earlier onset). On the maternal side, one sister had one or more febrile seizures, and one brother has a daughter diagnosed with epilepsy.	None	None	None	No consanguineity	None	None (variant de novo in the healthy mother, no other family members affected)	One brother with ASD, one healthy sister, a littler brother (born in 2021) with milesones delay. Paternal grandfather died of epilepsy which seems to have occurred as a result of a cranial trauma	One brother with ASD, one healthy sister, a littler brother (born in 2021) with milesones delay. Paternal grandfather died of epilepsy which seems to have occurred as a result of a cranial trauma	None	None
Parental age at birth: mother (M) - father (F) in years	26 (M) - 28 (F)	30 (M) - 32 (F)	37 (M) - n.d. (F)		23 (M) - 24 (F)	39 (M) - 40 (F)	29 ( M) - 29 ( F)	27 (M) - 32 (F)				NA	23 (M) - 22 (F)	28 (M) - 28 (F)	31 (M) - 31 (F)	34 (M) - 34 (F)		30 (M) - 38 (F)	24 (M) - 26 (F)	30 (M) - 33 (F)	34 (M) - 39 (F)			35 (M) - 37 (F)	20 (M) - 26 (F)	NA	27 (M) - 28 (F)		34 (M) - 37 (F)	36 (M) - 27 (F)	24 (M) - 29 (F)
Genetics
Mutation type	Start-loss	Start-loss	Start-loss	Frameshift	Frameshift	Frameshift	Frameshift	Frameshift	Frameshift	Frameshift	Frameshift	Frameshift	Frameshift	Nonsense	Nonsense	Nonsense	Frameshift	Missense	Missense	Nonsense	Missense	Missense	Missense	Nonsense	Missense	Frameshift	Missense	Missense	Frameshift	In-frame duplication	Splicing
Genomic coordinates (hg19)	g.47479126del	g.47479126del	g.47479126del	g.47434577dup	g.47435903del	g.47435903del	g.47433655del	g.47435786del	g.47435786del	g.47435786del	g.47435786del	g.47433948dup	g.47433481_47433593del	g.47433936G>A	g.47433936G>A	g.47433936G>A	g.47434162dup	g.47435616C>T	g.47435800G>A	g.47434568G>A	g.47435923C>A	g.47464692A>T	g.47464377C>A	g.47464406G>A	g.47478788T>C	g.47479091del	g.47435567G>A	g.47435567G>A	g.47435805_47435854del	g.47464692_47464694dup	g.47464780T>A
Exon (NM_006950.3)	Exon 1	Exon 1	Exon 1	Exon 10	Exon 7	Exon 7	Exon 12	Exon 8	Exon 8	Exon 8	Exon 8	Exon 12	Exon 12	Exon 12	Exon 12	Exon 12	Exon 11	Exon 9	Exon 8	Exon 10	Exon 7	Exon 4	Exon 5	Exon 5	Exon 1	Exon 1	Exon 9	Exon 9	Exon 8	Exon 4	IVS3
cDNA (NM_006950.3)	c.2del	c.2del	c.2del	c.1258dup	c.975del	c.975del	c.1729del	c.1001del	c.1001del	c.1001del	c.1001del	c.1439dup	c.1794_1906del	c.1447C>T	c.1447C>T	c.1447C>T	c.1321dup	c.1072G>A	c.986C>T	c.1264C>T	c.954G>T	c.614T>A	c.774G>T	c.745C>T	c.340A>G	c.39del	c.1121C>T	c.1121C>T	c.980+43_981del	c.614_616dup	c.528-2A>T
Protein (NM_006950.3)	p.?	p.?	p.?	p.(Arg420Profs*264)	p.(Tyr326Thrfs*2)	p.(Tyr326Thrfs*2)	p.(Ala577Profs*90)	p.(Asn334Thrfs*74)	p.(Asn334Thrfs*74)	p.(Asn334Thrfs*74)	p.(Asn334Thrfs*74)	p.(Leu481Ilefs*203)	p.(Thr601Glufs*45)	p.(Gln483*)	p.(Gln483*)	p.(Gln483*)	p.(Ala441Glyfs*243)	p.(Asp358Asn)	p.(Thr329Met)	p.(Arg422*)	p.(Lys318Asn)	p.(Leu205Gln)	p.(Met258Ile)	(p.Gln249*)	p.(Arg114Gly)	p.(Phe13Leufs*10)	p.(Ala374Val)	p.(Ala374Val)	p.(Met327Ilefs*81)	p.(Leu205dup)	p.?
Inheritance	Maternal	Maternal	Maternal	Maternal	Maternal	Maternal	Maternal	Maternal	Maternal	Maternal	Maternal	Maternal	Maternal	Maternal	Maternal	Maternal	Maternal	Maternal	De novo	Maternal	De novo	Maternal	Maternal	Maternal	Maternal	Maternal	Maternal	Maternal	Paternal (father low-level mosaicism)	De novo, mosaic (15%)	Maternal
Other significant associated genetics abnormalities (CNV, point mutation…)	None	Not investigated	Not investigated		None	None	None					Heterozygous deletion in TMTC1 (VUS)	VUS in BRCA2	None	None	None	None	None	Maternally inherited VUS in KMT2C (c.3874C>G)	De novo VUS in SUPT5H (c.1000C>T, p.(Arg334Trp))	Maternally inherited VUS in RELN	None	None	None	None	None				None	MYCBP2-VUS
Method of molecular diagnosis (WES, WGS, trio, singleton)	WES single	Sanger sequencing of familial variant	Sanger sequencing of familial variant		NGS Panel	NGS Panel	WES					WES	WES	Epilepsy gene panel	Sanger sequencing	Sanger sequencing	Epilepsy gene panel	Epilepsy gene panel (solo)	Trio WES	Trio WES	Trio WES	NGS panel (482 genes)	NGS panel (482 genes)	ID panel (451 genes)	ID panel (451 genes)	WES	WGS			Trio WES	Trio WES
Developmental stages
Pregnancy and delivery	Severe nausea in the first trimester, C-Section at 40+5 weeks	Normal pregnancy, elective C-section at 39 weeks	Normal		No complications during pregnancy, vaginal delivery at 41 weeks	Oligoamnios at 5th month, vaginal delivery at 40 weeks	Vaginal birth at term	Normal				NA	Normal	Premature 33 weeks	Term birth	Term birth	Normal	Normal	C-section due to breech position, dislocated righ thip	Maternal pneumonia at 10 weeks, treated with antibiotics; maternal use of valproate and lamotrigine; Birth at 41 weeks + 1 day	No complications, term delivery, good apgar scores	Normal	Normal	Mostly uneventful. Mother smoked 10 cigarettes/day; birth at 39 weeks; C-section due to previous pregnancy		Normal	Term birth with uneventful pregnancy	Term birth with uneventful pregnancy	Normal	Term birth with uneventful pregnancy	Normal, term delivery
Birth length in cm (z) / weight in g (z) / head circumference in cm (z)	52 (-0.4 z) / 3600 (-0.23 z) / 38 (1.68 z)	53 (0.48 z) / 3640 (0.36 z) / 37.5 (1.69 z)	NA		47.5 (-2.43 z) / 3250 (-1.08 z) / 35 (-0.69 z)	49 (-1.52 z) / 3480 (-0.31 z) / 35 (-0.46 z)	50 (-10.9 z) / 3000 (-1.41 z) / 33.5 (-1.62 z)	48 (-1.96 z) / 3080 (-1.23 z) / 35 (-0.46 z)				NA	48 (-1.96 z) / 3090 (-1.21 z) / 35.5 (-0.08 z)	47 (0.77 z) / 2100 (0.03 z) / NA (but normal)	51 (-0.65 z) / 3200 (-0.96 z) / NA (but normal)	52 (-0.22 z) / 3400 (-0.51 z) / NA (but normal)		NA / 3350 (-0.62 z) / NA	50.8 (-0.41 z) / 3458 (-0.04 z) / NA	NA / 2665 (-2.38 z) / NA	NA / normal / NA	54 (0.65 z) / 3900 (0.63 z) / 34 (-1.23 z)	50 (-1.09 z) / 3375 (-0.56 z) / 36 (0.31 z)	60 at 4m (-1.97 z) / 2500 (-5.28 z) / 42 at 4 m (-0.77 z)	52 (-0.22 z) / 4070 (1.01 z) / 36 (0.31 z)	NA	48.5 (-1.74 z) / 3070 (-1.26 z) / 34.5 (-0.85 z)	50.5 (-0.87 z) / 3070 (-1.26 z) / 35 (-0.46 z)	43 (-3.95 z) / 2270 (-2-85 z) / 33 (-1.46 z)	50 (-1.09 z) / 2700 (-2.1 z) / NA	48.2 (-1.87 z) / 3880 (0.58 z) / NA
Neonatal findings	Normal	Normal	NA			Plagiocephaly, unilateral cryptorchidism	Fetal pain	Transitory stenosis of pulmonary artery (normalization after 6 months)				NA	None	None	None	None	None	None		Hypoglycemia; Two seizures at day 2, attributed to withdrawal from (prenatal exposure of) anti-epileptic drugs	None	No	Feeding dificulties and delayed passage of meconium	None		None	None	None	Reflux	Ventriculomegaly	None
Age of sitting (m:months)	NA	NA	NA		12m	9m	9m	10m				NA	NA	10m	8m	9m	< 9m	6m	8m	Delayed	Normal	NA	NA	9m	10m	Normal (age NA)	6m	NA	8m	12m	6m
Age of walking (m:months, y:years)	12m	13m	2y	NA (delayed)	2y	12m	18m	15m	18m		2y	18m	17m	20m	18m	15m	16m	12m	1.5y	Delayed	1y	2y	18m	14m	24m	Normal (age NA)	12m	13m	15m	3y	12m
Age of first words (m:months, y:years)	12m	"Normal"	"Late"	NA (delayed)	No language	16m	18m	3y	Delayed	Delayed	Delayed	Language delay (age NA)	Still non verbal	15m	15m	15m	24m	3.5y	2y	Delayed	Normal	NA	NA	2y	NA	Normal (age NA)	24m	36m	3y	12y	18m
Age of first sentences (m:months, y:years)	"Normal"	"Normal"	NA		NA	Delayed	44y	After 8y				Language delay (age NA)	Still non verbal	24m	24m	30m	4y	4y	2y6m	Still non verbal	Normal; but at 3y logopedic treatment to improve pronounciation	3y	4y 6m	4y	NA	Normal (age NA)	48m	Delayed	4y	Never	NA
Regressive episode during the development / Age (m:months, y:years)	None	None			No		18m		No	No	No	NA	Yes (6y)	No	No	No	No	No	No	Loss of use of words; no other regression	Negative influence of high seizure frequency on cognitive and behavioral functioning	After 15y	No	No	No	After 10y: he loses track of tasks, forgets things, needs close support in problem solving, is easily distracted, has limited flexibility. After 12y: special educational assistance at least 9 hours per week	No	No	No	No	No
Current language ability	Speaks in sentences, but expressive and receptive language delay	Speaks in sentences, but expressive and receptive language delay	Speaks in sentences		Still non-verbal	Dyslexia	None	Short sentences	Short sentences	Short sentences	Short sentences	Normal	NA	Dysphasia, dyslexia, dyspraxia	Dysphasia, dyslexia, dyspraxia	Dysphasia, dyslexia, dyspraxia	Abnormal		Short sentences	Can only emit sounds (in the past: single words)	Normal, full sentences	Normal	Normal	Normal, complex sentences	Speech and language therapy	Language comprehension on the edge of the age average, age-appropriate vocabulary; immature linguistic abstraction and categorization	Functional language but disturbance of the pragmatics of language	Just few words	Little sentences	2-3 single words	Full verbal abilities
Intellectual disability (ID)
ID	Yes	Yes	Yes	Yes	Yes	NA	Yes	Yes	Yes	Yes	Yes	Yes	Yes	No			Yes	No	No	Yes	No	No	No		Yes	Yes	No	Yes	Yes	Yes	Yes
Estimated level of ID	Mild (can read and write, problems in maths, no understanding of quantities, calculating up to 200)	Mild (can read and write, problems in maths, no understanding of quantities)	Mild (estimated); cannot read / write / calculate		NA	NA	NA	Moderate (can work in ESAT, specific work for ID)	Mild (can work in ESAT, specific work for ID)	Mild	Mild (can work in ESAT, specific work for ID ; has 2 children (boys) without ID)	Mild	Severe	Normal	NA	NA		Normal	No assessment done	Severe-profound	Normal intelligence	Normal intelligence	Normal intelligence		Moderate	Borderline intellectual functioning	Normal intelligence	Delayed milstone, intellectual disability	Mild	Severe	Mild to moderate
Age at evaluation (y)	5-6y	6y					NA					50y	10m	8y			7y	10y	NA	15y	8y	22y	6y			13y5m	8y		5y6m		19y
Evaluation Scale	SON-R						NA					NA	NA				WIPPSI IV NEPSY	KABC-2	NA	NA	WISC-III	WAIS-III (IQ=79; VIQ=77; PIQ=86)	WISC-IV (VIQ=86)			WISC-V: Verbal Comprehension 86 Visual-Spatial 86 Reasoning 79 Working memory 85 Processing speed 63	WISC-V				Informal
Mean IQ	65	71					NA		QIV: 56 / QIP: 61			NA	NA	Normal	NA	NA	75	NA (difficult to adress due to behavioral problems)	NA	NA	99	79	78			Full-Scale IQ 74	89	<5th			NA
Behavioral issues
ASD	No	No	Yes	Yes	Yes	No	Yes	Yes				NA	Yes	No	No	No	No	Yes	No	NA	Yes	NA	NA	Yes		No	Yes	Yes		No	No
Age at evaluation			22y				5y												N/A		9y						6y (social scores 10; Communication scores 7; Behavior scores 5)	2y			NA
Age at first symptoms			Childhood				3y						6m						N/A					4y			24m	18m			NA
Other behavioral issues	Hyperactivity, short attention span, Tic since infancy (bites finger when excited)	Short attention span, avoids eye contact when talking	Screamed a lot as child, temper tantrums, aggressive episodes, tics	Hyperactive	Aggressivity, hyperactivity, severe sleep disorder (sleep terror and nocturnal sleep disruption), picky eating	ADHD	None	Poor eye contact, stereotypies (Treatment risperidone)					Stereotipies	ADHD				Aggressiveness, anxiety	Impulsivity, concerns		ADHD diagnosed at 8y; high sensitivity to stimuli; severe deterioration of behaviour (6m before onset of epilepsy)	Impulsive behavior	Impulsive behavior, encopresis, hallucination, hyperphagia		Friendly behavior, anxious, hyperkinetic	None (Good social skills and empathy)	ADHD	Sleep disorder		None	ADHD
Psychiatric comorbidities							None			"Psychotic syndrome", schizophrenia (25 years). Treatment Solian, Nozinan				PNES (psychogenic non epileptic seizures) associated with epileptic seizures	PNES (psychogenic non epileptic seizures) associated with epileptic seizures	None	None									None				None	No
EPILEPSY
Epilepsy	Yes	Yes	Yes	Yes	Yes	Yes	Yes	Yes	Yes		Yes	Yes	Yes	Yes	Yes	Yes	Yes	Yes	No	Yes	Yes	Yes	Yes	No	Yes	Yes	No	No	No	Yes	Yes
Age at seizure onset (m:months or y:years)	7y 11m		NA		7y	3y	5y	12y	11y			13y	6m	8y	13y	11y	10m	1y		7m	9y	11y	Suspected on hallucinations (11y)		16m	10y				12m	18m
Seizure type at onset	Nocturnal focal seizures	At 3 years dizzy spells (duration of seconds), EEG normal			Generalized tonic-clonic seizure	Myoclonia Isolated	Contact break seizure	Tonic-clonic generalized	Tonic-clonic generalized			Tonic-clonic seizures	Tonic-clonic seizures and focal seizures with impaired awairness	Focal seizures with impaired awairness (temporal origin)	Focal seizures with impaired awairness	Focal seizures with impaired awairness with hypersialorrhea	Focal seizures of temporo-perisylvian origin	Focal seizures with secondary generalization		Unknown	Sleep-related tonic-clonic	Generalized tonic-clonic			First seizure was non-febrile, generalized, lasting two minutes	Focal seizures triggered by toothbrushing with impaired awareness (duration 15-30 sec), transient hypotonia, metallic taste, and unmotivated laugh. Also episodes with sensory sensation of "raindrops on the forehead"				Generalized tonic-clonic	Atonic
Seizure types during disease course	Focal seizures (nocturnal +++)	At 5y tonic-clonic seizures in the bathtub (warm water as a trigger), no occurrence in the shower (seizure-free since avoidance of baths)	Notices seizure beforehand, occurence approx. every 6 months, stiffness - lasting a few seconds - and salivation	Focal seizures (nocturnal +++)	Generalized tonic-clonic seizure (second part of the night)		Generalized tonic-clonic seizures					Tonic-clonic seizures	Tonic-clonic seizures + focal seizures with impaired awairness + absence seizures	Secundary generalization	Secundary generalisation	Focal seizures with impaired awairness with hypersialorrhea	Reflex bathing seizures of temporo-perisylvian origin and spontaneous morpheic seizures	Focal seizures with secondary generalization		Tonic-clonic seizures; also absence/focal impaired awareness seizures	Sleep-related tonic-clonic; focal impaired awareness seizures; tonic seizures	Reflex epilepsy (defecation)			2y: febrile and non-febrile seizures. 5y: focal seizure secondarily generalized triggered by stroboscope. 6y: focal onset then hemicorporeal clones, cyanosis	Focal seizures triggered by bathing or showering with impaired awareness, associated with pallor, cyanotic lips, buccal automatisms, salivation, repetitive behavior and transient hypotonia. Duration of 30 - 90 sec. Possibly preceded by subjective cold sensation.				Only generalized tonic-clonic. Once he had an hemiclonic seizure	Atonic
Febrile seizures	No	No	No		No	No	Yes, a few	No				NA	No	No	No	No		1 episode at onset (gastroenteritis)		NA	No	Yes	No		Yes	No				Yes, including febrile status	No
Status epilepticus					No	No	No							No	No	No	0	1 episode before treatment onset		NA	Once	No	No			No				Yes	No
Frequency of seizures	Once every 1-2 months			1/month	1 -2 seizures/year with LAMICTAL	0	Weekly					No seizures since several years	Few	Once a month	Once every three months	Once every three months	1/week	Rare after treatment onset		At least 1/month	At least 1/week (seizure reduction after NVS)	Stopped with treatment	Only once			From approx. 1 seizure per week at the onset to 1-2 seizures per month				1-2 per month, typically after waking up	Infrequent, none for past 14 years
Presence of Reflex seizures	Suspicious episodes when drying off after bath/shower (paleness, weakness, duration of 30 sec); seizures after pushing for bowel movements	At 5y tonic-clonic seizures in the bathtub (warm water as a trigger), no occurrence in the shower (seizure-free since avoidance of baths)			Seizure triggered by emotions and lightning	No	1 or 2 seizures (absence) after bathing					NA	NA	Triggered by shower with warm water +++	Triggered by shower with warm water +++	Triggered by shower with warm water +++	Yes	No		Yes, tonic-clonic seizures provoked by showering and using the swimming pool (since age 6y)	No; only sleep-related seizures	Yes (when defecating)	Yes		Yes	Reflex seizures immediately after hot / lukewarm bath or shower, but not after each bath/shower: seizures are triggered by contact with water over the body and not pouring water over the head				Only once he had a seizure with hot bath	History of seizures being triggered by touching water. No reference to temperature
Tried/current anti-epileptic treatment	Sultiame, Oxcarbazepine		Valproate, Levetiracetame	On the epileptic level, he has not had a seizure since November 2016 on TRILEPTAL at a dose of 1900 mg/d with no reported side effects other than phases of asthenia.	Depakine/Sabril/Lamictal	Micropakine	Vimpat Fycompa,Lamictal (Tritherapy)	Valproate + lamotrigin	Valproate			Tegretol	Epitomax, keppra, rivotril	Oxcarbamazepinez, Brevetiracetam	Lamotrigine	Lacosamide	Valproate, lamotrigine, clobazam	Carbamazepine		NR/clonazepam, oxcarbazepine and valproate	Valproate, levetiracetam, brivaracetam/ carbamazepine, clobazam	Lamotrigin	No		Treatment by LVT	ESL since summer 2020 to February 2021, switched to CBZ (Tegretol R). July 2021: switch from CBZ to ZNS. September 2021: ZNS + CBZ (current treatment)				Current_ CLB, ZNS, LMT, ESL. Previously LEV, VPA, PHT, PER	Primodone as young child, currently takes Lamotrigine
Pharmoresistance (yes/no)	(Yes)			No		No	Yes	No				No	Yes	Yes	Yes	Yes	Yes	No. Last seizures at 6 years		Yes	Yes; NVS implanted	No				Yes				Yes	No
Electroencephalogram
Age at examination (y:years, m:months)	8y 1m	2y 10m		16y	26y		5y	5y				NA	6m	17y	from 13 to 16y	from 11 to 13y	6.5y	7y	NA	14y	9y	23y	11y	4y	3y	13y9m (EMU)				17y	7y
Main abnormalities	Slow focus occipito-fronto-parietal	Normal		Abnormal background rhythm of the more or less pointed teta type, perhaps with a central predominance, without any real paroxysm	Multifocal slow activity	Interictal generalized spike wave activity	Frontal (central) right	Left fronto-temporal focus without clinical manifestation				NA	Slow focus, posterior left	Normal	Normal	Normal		Right occipital spikes		Multifocal epileptiform activity (occipital, frontal)	Epileptic activity from left fronto-lateral	Focal slow spike-waves (left frontal and temporal lobes)	Diffuse slow spike-waves	Normal	Nap sleep that appears imperfectly organized (hypnic figures rare and sometimes difficult to individualize) but devoid of peak figures.	EMU performed for two days: no epileptic or other abnormal activity has been reported				Multifocal epileptiform activity (predominantly frontal), background slowing	None
Triggers of seizures	Rubbing with towel, defecation	Bathing with warm water			Emotions and thunderbolt		Sleep, illness, digestive troubles, bathing					NA	Spontaneous	Shower with warm water	Shower with warm water	Shower with warm water	Reflex seizures with warm water	No		NA	NA	Defecation	Hyperpnea	No	Stroboscope	Toothbrushing, bathing or showering				no	Contact with water
Latest clinical Examination
Age at examination (y:years, m:months)	8y2m // 13y	5y 3m // 9y	22y	16y	10y	5y	9y	20y	?	50y		50y	5y 9m	18y	15y	13y	8.5y	7y	3y 10m	15y	11y	23y	11y	12y	9y	13y 4m	6y		6y 9m	17y	19y
Height in cm (z) / weight in kg (z) / head circumference in cm (z)	140 (1.48 z) / 34.5 (1.19 z) / BMI 17.6 (0.71 z) / 54.6 (1.21 z) // at 13y 175cm/65kg	120 (1.31 z) / 26 (1.31 z) / BMI 18.1 (1.48 z) / 52.5 (0.55 z) // at 9y 150cm/45kg	175 (-1.06 z) / 92 (1.73 z) / BMI 30.0 (2.09 z) / 59.6 (1.93 z)	176.7 (0.01 z) / 80 (1.26 z) / NA	119 (-3.36 z) / 23 (-2.60 z) / 51 (-1.94 z)	112 (0.06 z) / 20.4 (0.42 z) / 54.2 (1.99 z)	133 (-0.56 z) / 28 (-0.53 z) / NA	191 (2.04 z) / 90 (1.31 z) / 58.5 (2.37 z)	171 / 90.8 / 59	182 (0.76 z) / 80 (0.67 z) / NA		180 (0.48 z) / 100 (1.92 z) / 59 (2.72 z)	103.5 (-2.63 z) / 18.2 (-1.05 z) / NA	180 (-0.09 z) / 65 (-0.60 z) / NA	168 (-0.58 z) / 59 (-0.08 z) / NA	162 (0.33 z) / 58 (0.91 z) / NA	135 (0.24 z) / 33 (0.75 z) / 53 (0.07 z)	123 (-0.26z) / 39 (2.46 z) / 55.5 (2.24 z)	101 (-0.32 z) / 14.6 (-0.70 z) / 50 (0.03 z)	175 (0.29 z) / NA / NA	141 (-0.72 z) / 35 (-0.33 z) / 53.6 (-0.33 z)	187 (1.47 z) / 76 (0.43 z) / 59 (2.72 z)	147.5 (0.17 z) / 51.8 (1.50 z) / 57.5 (2.52 z)	149 (-0.36 z) / 37 (-0.59 z) / 55 (0.38 z)	132.6 (-0.62 z) / 31.5 (0.19 z) / 51.5 (-1.30 z)	156 (-0.68 z) / 44.9 (-0.47 z) / NA	124 (1.09 z) / 27.5 (1.49 z) / 53 (0.66 z)		122 (-0.07 z) / 44 (3.02 z) / 52 (0.48 z)	140 (-5.55 z) / 42 (-3.91 z) / NA	165 (-1.6 z) / 96.6 (1.73 z) / NA
Neurologic examination	Normal	Normal		Normal	Normal		Normal despite agitation	Normal (hypomimic but treatment with risperidone)	Hypomimic, ptosis			Normal	Normal	Normal	Normal	Normal	Normal	Normal	Normal	Axial hypotonia and spasticity of the legs	Normal	Normal	Normal	Normal	Normal (no oculomotor apraxia, no motor deficit, no reflex anomaly, no obvious ataxia)	Normal	Normal		Normal	Clubfoot, mild arthrohryposis (distal), drooling, mild hypotonia	Not performed (telemedicine visit)
Truncal hypotonia	No	No		No	No	No	No					No	Yes, moderate	No	No	No	No	No	Yes	Yes	No	No	No	No	Yes	No	No			Yes	No
Dysmorphic features	None	None	None		None	Tall forehead, occipital plagiocephaly, cleft helix, protruding ears	None	Gynoid morphology				Brachydactily, long face, large chin, dense eyesbrows, bulbous nose	Downwards tapered palpebral fissures, mild enophthalmia, brachydactyly, high forehead, short philtrum	None	None	None	None	None	Tapered fingers, highly arched feet	Pronounced facial dysmorphic features: synophrys, short nose, depressed nasal root	None	None	None	None	Facial hypotonia, ears with simplified pavilion, short hallux, flat feet, skin xerosis, some lentigines, eczema	None	None		Upslanting palpebral fissure, hypertrychosis	Rethrognatia, hypertelorism	No
Brain imaging (MRI)
Main finding (age at examination in y:years m:months)	Normal (8y1m)	Normal (2y10m)	Not performed	Nodular heterotopia, subcerebellar arachnoid cyst	Moderate ventricular dilation, small hypophysis (4y)	T2 signal abnormality and enlarged Virchow-Robin space volumes (4y)	Normal (5y)	Normal (5y)				NA	Normal	Normal	Normal	Normal	Normal	NA	NA	Postnatal ultrasounds showed progressive widening of ventricle system. MRI: wide central and peripheral liquor spaces; loss of white matter	Normal (10y)	Normal (18y)	Normal (11y)	Normal (4y6m)	Normal	Minor multicystic corpus pineal cyst (8mm, unchanged from 2018) (13y 5m)	NA	NA	NA	Ventriculomegaly, mild atrophy	None
Others
Other significant comorbidities	None	None	Developmental disorder originally attributed to craniocerebral trauma at 8 months of age				Diabetes			Diabetes (onset 32y). Hemicolectomy for adenocarinome caecum (47y)		Myopia		Willebrant factor, hemophilia, asthma	Ankylosing spondylisis	none								Mitral and tricuspide valves prolapsus; moderate dilatation of aorta	Significantly low proline at 76µM (133-227)	Allergies: Animals, grass pollen and house dust mites				Central hypotiroidism in treatment with levothyroxin	None
Negative tests	46,XY, microarray, Fragile-X	None	None																Microarray					X fragile, CGH, caryotype	X fragile	None					CMA
X inactivation in females
X inactivation results	Not skewed in healthy carrier mother	Not skewed in healthy carrier mother												Mother carrier NA	Mother carrier NA		Mother carrier NA	Mother (50 :50), aunt (80 :20), maternal grandmother (60 :40)						Mother carrier NA	Mother carrier NA				Patient skewed X-inactivation (5:95), mother random X- inactivation (75:25)		Mother carrier NA
DD: developmental delay. ID: intellectual disabiity. ASD: autism spectrum disorder. ADHD: attention deficit hyperactivity disorder.

## Sheet: Supplementary Table 3
Supplementary Table 3. Fisher Test males vs females
feature	OR	log2OR	pvalue	adj_pvalue
DD	0	-13.2877	0.306851	1
ID	0.829395	-0.269695	1	1
Behavioral issues	2.11116	1.07811	0.465468	1
ASD	1.45271	0.538848	1	1
ADHD	0.957685	-0.0622269	1	1
Other behavioral issues	1.57247	0.653125	1	1
Epilepsy	1.89099	0.919221	0.405192	1
Reflex epilepsy	1.31559	0.395822	0.702906	1
Legend: DD: developmental delay. ID: intellectual disabiity. ASD: autism spectrum disorder. ADHD: attention deficit hyperactivity disorder.

## Sheet: Supplementary Table 4
Supplementary Table 4. Fisher Test truncating (TV) vs non-truncating variants (NTV)
feature	OR	log2OR	pvalue	adj_pvalue
DD	0.0907545	-3.4603	0.0097605	0.078084
ID	3.0784	1.62223	0.11047	0.883761
Behavioral issues	1.2111	0.276441	1	1
ASD	1.16227	0.217066	1	1
ADHD	1.96404	0.9739	0.475678	1
Other behavioral issues	0.879316	-0.185382	1	1
Epilepsy	7.89857	2.98161	0.00104426	0.00835408
Reflex epilepsy	4.72354	2.2399	0.00978457	0.0782766
Legend: DD: developmental delay. ID: intellectual disabiity. ASD: autism spectrum disorder. ADHD: attention deficit hyperactivity disorder.

## Sheet: Supplementary Table 5
Supplementary Table 5. Fisher Test epilepsy enrichment of other features
feature	OR	log2OR	pvalue	adj_pvalue
DD	0	-13.2877	0.0474794	0.142438
ID	0.623011	-0.682438	0.713335	1
ASD	0.170034	-2.55526	0.114274	0.342821
Legend: DD: developmental delay. ID: intellectual disabiity. ASD: autism spectrum disorder. E: epilepsy.

## Sheet: Supplementary Table 6
Supplementary Table 6. Mann Whitney Test age of onset epilepsy-ID severity
.y.	group1	group2	n1	n2	statistic	p	p.adj	p.adj.signif
Age of onset	borderline mild	moderate	14	5	49.5	0.194	0.582	ns
Age of onset	borderline mild	severe profound	14	5	64	0.008	0.025	*
Age of onset	moderate	severe profound	5	5	21	0.091	0.272	ns
